# Supplementary material for: Prediction of diabetic kidney disease with machine learning algorithms, upon the initial diagnosis of type 2 diabetes mellitus
Source: PubMed Central journal article supplement — BMJ Open Diabetes Res Care. 2022 Jan 19;10(1):e002560. doi: 10.1136/bmjdrc-2021-002560 (PMC8772425; doi:10.1136/bmjdrc-2021-002560), 2022-01-19

## Supplementary Material

**Supplementary Table 1:** ICD codes used to classify patients.

| Medical Condition      | ICD-9 code     | ICD-10 code |
|------------------------|----------------|-------------|
| Type 2 Diabetes        | 250.x0, 250.x2 | E11         |
| Type 1 Diabetes        | 250.x1, 250.x3 | E10, O24.0  |
| Kidney Transplant      | V42.0          | Z94.0       |
| Chronic Kidney Disease | 585.9          | N18.9       |

**Supplementary Table 2:** Hyperparameters tuned for each MLA model.

|                    |                                                                                                                                                                                                                                                                                                                                                                                                                                                                                                                                                                                                                                                                                                      |
|--------------------|------------------------------------------------------------------------------------------------------------------------------------------------------------------------------------------------------------------------------------------------------------------------------------------------------------------------------------------------------------------------------------------------------------------------------------------------------------------------------------------------------------------------------------------------------------------------------------------------------------------------------------------------------------------------------------------------------|
| Random forest (RF) | <ul style="list-style-type: none"> <li>○ Max_depth = 12, the maximum depth of each tree</li> <li>○ N_estimators = 580, the number of trees in the ensemble</li> <li>○ Criterion (one of Gini or Entropy) = Entropy, the criteria used to evaluate utility of splits</li> <li>○ Max_features (one of Log2 or Sqrt) = Sqrt, the number of features to consider when looking for the best split</li> <li>○ Class_weight (one of balanced or balanced subsample) = balanced, the weight given to the positive and negative classes when calculating the training loss</li> <li>○ Min_samples_split = 208, the minimum number of examples found in a node to be able to split the node further</li> </ul> |
|--------------------|------------------------------------------------------------------------------------------------------------------------------------------------------------------------------------------------------------------------------------------------------------------------------------------------------------------------------------------------------------------------------------------------------------------------------------------------------------------------------------------------------------------------------------------------------------------------------------------------------------------------------------------------------------------------------------------------------|

|                                                      |                                                                                                                                                                                                                                                                                                                                                                                                                                                                                                                                                                                                                    |
|------------------------------------------------------|--------------------------------------------------------------------------------------------------------------------------------------------------------------------------------------------------------------------------------------------------------------------------------------------------------------------------------------------------------------------------------------------------------------------------------------------------------------------------------------------------------------------------------------------------------------------------------------------------------------------|
| <p>Gradient boosted tree model<br/>XGBoost (XGB)</p> | <ul style="list-style-type: none"> <li>○ Eta = 0.20, learning rate</li> <li>○ Gamma = 4.44, loss reduction require to split a node in the tree</li> <li>○ Max_depth = 11, the maximum depth in each tree</li> <li>○ Lambda = 15.2, the strength of L2-regularization</li> <li>○ Scale_pos_weight = 21.3, the weight for each positive example when calculating the training loss</li> <li>○ Min_child_weight = 202.7, the minimum sum of the instance weight for a node to be able to split</li> <li>○ Use Preprocessing? = True, whether or not to impute and scale the data before input to the model</li> </ul> |
|------------------------------------------------------|--------------------------------------------------------------------------------------------------------------------------------------------------------------------------------------------------------------------------------------------------------------------------------------------------------------------------------------------------------------------------------------------------------------------------------------------------------------------------------------------------------------------------------------------------------------------------------------------------------------------|

**Supplementary Table 3.** Demographic information and comorbidities for the hold-out test dataset.

|                  | Test Demographics | No CKD        | Any Stage CKD | Stage $\geq 3$ CKD | Stage $\geq 4$ CKD |
|------------------|-------------------|---------------|---------------|--------------------|--------------------|
| <b>Age</b>       |                   |               |               |                    |                    |
|                  | 18-29 yo          | 121 (2.2%)    | 19 (0.9%)     | 7 (0.6%)           | 140 (1.8%)         |
|                  | 30-39 yo          | 381 (6.9%)    | 56 (2.6%)     | 14 (1.1%)          | 437 (5.7%)         |
|                  | 40-49 yo          | 1,058 (19.1%) | 227 (10.7%)   | 94 (7.5%)          | 1,285 (16.8%)      |
|                  | 50-59 yo          | 1,687 (30.5%) | 478 (22.6%)   | 236 (18.9%)        | 2,165 (28.3%)      |
|                  | 60-69 yo          | 1,415 (25.6%) | 621 (29.3%)   | 407 (32.6%)        | 2,036 (26.6%)      |
|                  | $\geq 70$ yo      | 875 (15.8%)   | 718 (33.9%)   | 492 (39.4%)        | 1,593 (20.8%)      |
| <b>Sex</b>       |                   |               |               |                    |                    |
|                  | Female            | 3,059 (55.2%) | 1,073 (50.6%) | 619 (49.5%)        | 4,132 (54.0%)      |
|                  | Male              | 2,478 (44.8%) | 1,046 (49.4%) | 631 (50.5%)        | 3,524 (46.0%)      |
| <b>Ethnicity</b> |                   |               |               |                    |                    |
|                  | Caucasian         | 4,330 (78.2%) | 1,714 (80.9%) | 1,022 (81.8%)      | 6,044 (78.9%)      |
|                  | African American  | 624 (11.3%)   | 282 (13.3%)   | 169 (13.5%)        | 906 (11.8%)        |
|                  | Asian             | 138 (2.5%)    | 30 (1.4%)     | 11 (0.9%)          | 168 (2.2%)         |

|                                                         |               |             |             |               |
|---------------------------------------------------------|---------------|-------------|-------------|---------------|
| Other/Unknown Race                                      | 445 (8.0%)    | 93 (4.4%)   | 48 (3.8%)   | 538 (7.0%)    |
| <b>Comorbidities</b>                                    |               |             |             |               |
| (Presence of) Coronary Artery Bypass Graft              | 68 (0.5%)     | 52 (1.0%)   | 34 (1.2%)   | 120 (0.7%)    |
| Acute Kidney Injury                                     | 44 (0.3%)     | 41 (0.8%)   | 30 (1.0%)   | 85 (0.5%)     |
| Anemia                                                  | 544 (4.3%)    | 245 (4.9%)  | 151 (5.1%)  | 789 (4.5%)    |
| Arrhythmia                                              | 614 (4.8%)    | 302 (6.0%)  | 179 (6.1%)  | 916 (5.2%)    |
| Cancer/Solid Tumor                                      | 412 (3.2%)    | 191 (3.8%)  | 122 (4.2%)  | 603 (3.4%)    |
| Cardiovascular Disease (CVD)                            | 713 (5.6%)    | 392 (7.8%)  | 249 (8.5%)  | 1,105 (6.2%)  |
| Congestive Heart Failure (CHF)                          | 200 (1.6%)    | 129 (2.6%)  | 91 (3.1%)   | 329 (1.9%)    |
| Dyslipidemia                                            | 2,604 (20.5%) | 918 (18.3%) | 522 (17.8%) | 3,522 (19.9%) |
| Heart Valve Disease                                     | 225 (1.8%)    | 118 (2.4%)  | 74 (2.5%)   | 343 (1.9%)    |
| Hyperglycemia                                           | 2,137 (16.8%) | 571 (11.4%) | 304 (10.4%) | 2,708 (15.3%) |
| Hypertension                                            | 2,584 (20.3%) | 996 (19.9%) | 567 (19.3%) | 3,580 (20.2%) |
| Obesity                                                 | 1,282 (10.1%) | 328 (6.5%)  | 153 (5.2%)  | 1,610 (9.1%)  |
| Peripheral Vascular Disease (PVD)                       | 133 (1.0%)    | 83 (1.7%)   | 56 (1.9%)   | 216 (1.2%)    |
| Previous Percutaneous transluminal coronary angioplasty | 92 (0.7%)     | 50 (1.0%)   | 30 (1.0%)   | 142 (0.8%)    |
| Prior MI                                                | 159 (1.3%)    | 84 (1.7%)   | 50 (1.7%)   | 243 (1.4%)    |
| Proteinuria                                             | 43 (0.3%)     | 30 (0.6%)   | 18 (0.6%)   | 73 (0.4%)     |
| Stroke/Transient Ischemic Attack                        | 218 (1.7%)    | 117 (2.3%)  | 77 (2.6%)   | 335 (1.9%)    |
| Type I Diabetes                                         | 183 (1.4%)    | 98 (2.0%)   | 57 (1.9%)   | 281 (1.6%)    |

**Supplementary Table 4.** Demographic information and comorbidities for the external test dataset.

| External Demographics | No CKD        | Any Stage CKD | Stage $\geq 3$ CKD | Stage $\geq 4$ CKD |
|-----------------------|---------------|---------------|--------------------|--------------------|
| <b>Age</b>            |               |               |                    |                    |
| 18-29 yo              | 358 (2.3%)    | 66 (0.9%)     | 18 (0.4%)          | 10 (0.8%)          |
| 30-39 yo              | 1,122 (7.2%)  | 236 (3.1%)    | 99 (2.0%)          | 34 (2.6%)          |
| 40-49 yo              | 2,906 (18.7%) | 700 (9.3%)    | 336 (6.7%)         | 112 (8.4%)         |

|                      |                                                         |                |               |               |             |
|----------------------|---------------------------------------------------------|----------------|---------------|---------------|-------------|
|                      | 50-59 yo                                                | 4,819 (31.0%)  | 1,683 (22.3%) | 972 (19.5%)   | 271 (20.4%) |
|                      | 60-69 yo                                                | 3,669 (23.6%)  | 2,114 (28.0%) | 1,451 (29.1%) | 363 (27.3%) |
|                      | ≥70 yo                                                  | 2,657 (17.1%)  | 2,743 (36.4%) | 2,111 (42.3%) | 539 (40.6%) |
| <b>Sex</b>           |                                                         |                |               |               |             |
|                      | Female                                                  | 8,381 (54.0%)  | 3,843 (51.0%) | 2,578 (51.7%) | 672 (50.6%) |
|                      | Male                                                    | 7,150 (46.0%)  | 3,699 (49.0%) | 2,409 (48.3%) | 657 (49.4%) |
| <b>Ethnicity</b>     |                                                         |                |               |               |             |
|                      | Caucasian                                               | 12,061 (77.7%) | 5,890 (78.1%) | 3,921 (78.6%) | 956 (71.9%) |
|                      | African American                                        | 2,652 (17.1%)  | 1,418 (18.8%) | 920 (18.4%)   | 323 (24.3%) |
|                      | Asian                                                   | 238 (1.5%)     | 72 (1.0%)     | 44 (0.9%)     | 14 (1.1%)   |
|                      | Other/Unknown Race                                      | 580 (3.7%)     | 162 (2.1%)    | 102 (2.0%)    | 36 (2.7%)   |
| <b>Comorbidities</b> |                                                         |                |               |               |             |
|                      | (Presence of) Coronary Artery Bypass Graft              | 250 (0.8%)     | 183 (1.2%)    | 128 (1.2%)    | 28 (1.1%)   |
|                      | Acute Kidney Injury                                     | 141 (0.4%)     | 128 (0.8%)    | 86 (0.8%)     | 16 (0.6%)   |
|                      | Anemia                                                  | 1,583 (4.8%)   | 825 (5.3%)    | 581 (5.6%)    | 151 (6.1%)  |
|                      | Arrhythmia                                              | 1,660 (5.0%)   | 1,049 (6.7%)  | 742 (7.2%)    | 193 (7.8%)  |
|                      | Cancer/Solid Tumor                                      | 1,500 (4.5%)   | 801 (5.1%)    | 555 (5.4%)    | 123 (5.0%)  |
|                      | Cardiovascular Disease (CVD)                            | 2,208 (6.6%)   | 1,510 (9.6%)  | 1,065 (10.3%) | 266 (10.7%) |
|                      | Congestive Heart Failure (CHF)                          | 513 (1.5%)     | 515 (3.3%)    | 388 (3.7%)    | 133 (5.4%)  |
|                      | Dyslipidemia                                            | 6,456 (19.4%)  | 2,502 (16.0%) | 1,548 (15.0%) | 330 (13.3%) |
|                      | Heart Valve Disease                                     | 704 (2.1%)     | 450 (2.9%)    | 317 (3.1%)    | 69 (2.8%)   |
|                      | Hyperglycemia                                           | 5,306 (16.0%)  | 1,423 (9.1%)  | 813 (7.9%)    | 130 (5.2%)  |
|                      | Hypertension                                            | 6,444 (19.4%)  | 2,885 (18.4%) | 1,882 (18.2%) | 425 (17.1%) |
|                      | Obesity                                                 | 2,942 (8.8%)   | 930 (5.9%)    | 541 (5.2%)    | 105 (4.2%)  |
|                      | Peripheral Vascular Disease (PVD)                       | 396 (1.2%)     | 334 (2.1%)    | 246 (2.4%)    | 73 (2.9%)   |
|                      | Previous Percutaneous transluminal coronary angioplasty | 301 (0.9%)     | 165 (1.1%)    | 123 (1.2%)    | 23 (0.9%)   |
|                      | Prior MI                                                | 393 (1.2%)     | 245 (1.6%)    | 169 (1.6%)    | 36 (1.5%)   |
|                      | Proteinuria                                             | 122 (0.4%)     | 101 (0.6%)    | 59 (0.6%)     | 17 (0.7%)   |
|                      | Stroke/Transient Ischemic Attack                        | 671 (2.0%)     | 439 (2.8%)    | 306 (3.0%)    | 78 (3.1%)   |

|                 |            |            |            |           |
|-----------------|------------|------------|------------|-----------|
| Type I Diabetes | 527 (1.6%) | 306 (2.0%) | 190 (1.8%) | 71 (2.9%) |
|-----------------|------------|------------|------------|-----------|

**Supplementary Figure 1.** Area under the receiver operating characteristic curve (AUROC) plots of machine learning (ML) models random forest (RF) and gradient boosted tree (XGB), and Centers for Disease Control and Prevention (CDC) CKD scoring system for a) hold-out dataset and b) external validation dataset for prediction of any-stage DKD in the five years following T2DM diagnosis. A random classifier was used as the baseline

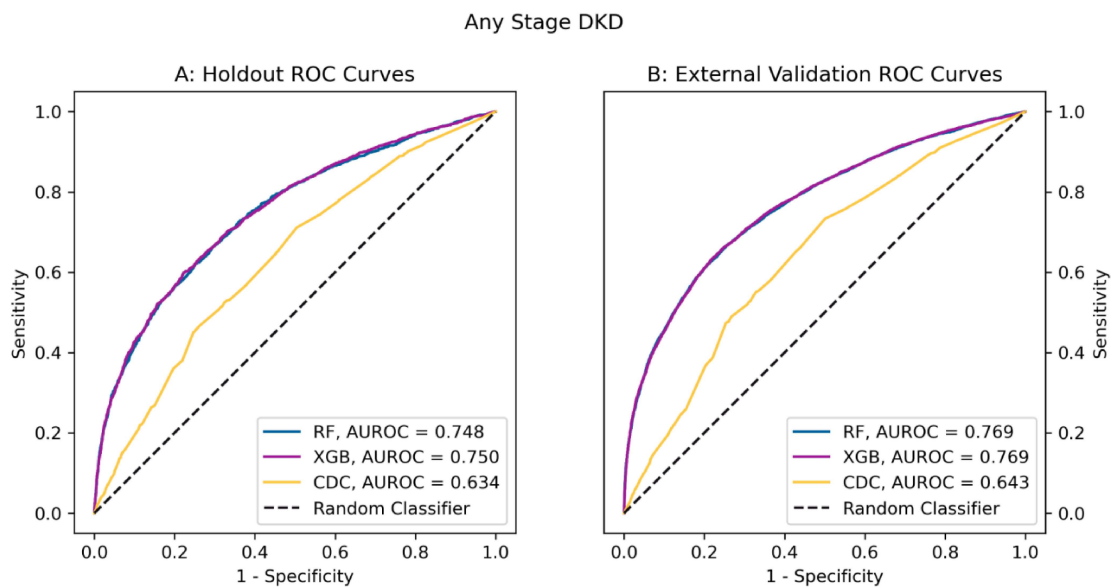

**Supplementary Figure 2.** Area under the receiver operating characteristic curve (AUROC) plots of machine learning (ML) models random forest (RF) and gradient boosted tree (XGB), and Centers for Disease Control and Prevention (CDC) CKD scoring system for a) hold-out dataset and b) external validation dataset for prediction of DKD stages 4-5 in the five years following T2DM diagnosis. A random classifier was used as the baseline.

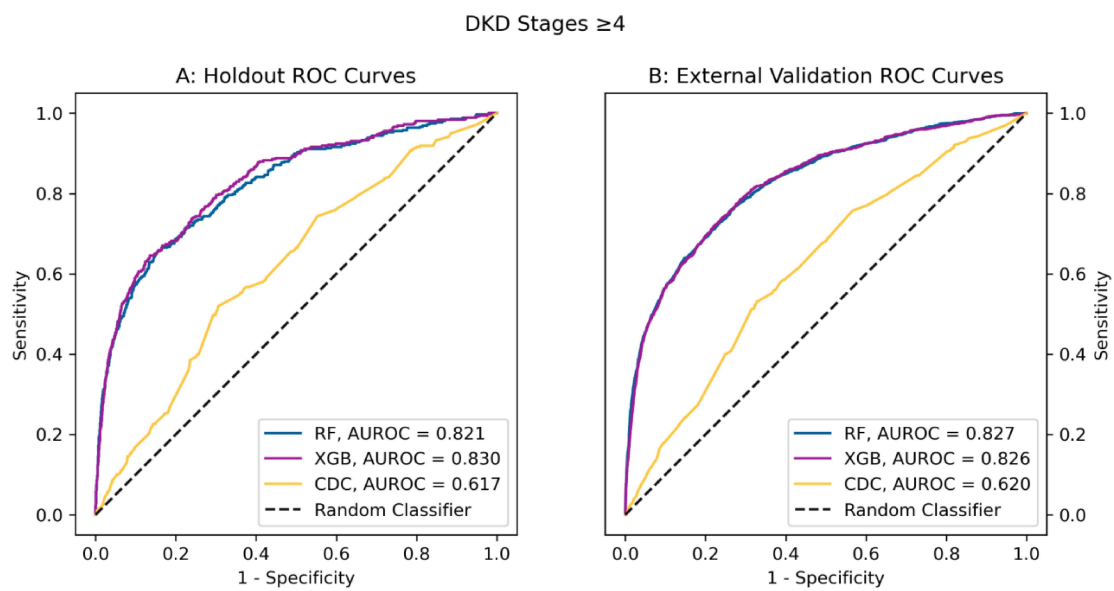

Supplement: bmjdrc-2021-002560supp001.pdf [file bmjdrc-2021-002560supp001.pdf]
